# Supplementary material for: Daphnetin: A Novel Anti-Helicobacter pylori Agent
Source: PubMed Central journal article supplement (PMC6412720; doi:10.3390/ijms20040850), 2019-02-15
Supplement: ijms-20-00850-s001.pdf [file ijms-20-00850-s001.pdf]

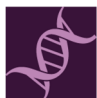

**Table S1.** MICs of metronidazole, clarithromycin and daphnetin against *H. pylori* strains.

| Strain Number    | Source            | Specimen Date | Location          | MICs ( $\mu\text{g/ml}$ )    |                                          |                                    |
|------------------|-------------------|---------------|-------------------|------------------------------|------------------------------------------|------------------------------------|
|                  |                   |               |                   | Daphnetin<br>NA <sup>a</sup> | Clarithromycin<br>$S \leq 0.25, R > 0.5$ | Metronidazole<br>$S \leq 8, R > 8$ |
| CCPMAP<br>150001 | gastric<br>antrum | 2015          | CCPM <sup>a</sup> | 25                           | 0.016                                    | 32                                 |
| CCPMAP<br>150002 | gastric<br>antrum | 2015          | CCPM              | 50                           | 1                                        | 2                                  |
| CCPMAP<br>150003 | gastric<br>antrum | 2015          | CCPM              | 50                           | 0.016                                    | 64                                 |
| CCPMAP<br>160001 | gastric<br>antrum | 2016          | CCPM              | 50                           | 0.016                                    | 32                                 |
| CCPMAP<br>160002 | gastric<br>antrum | 2016          | CCPM              | 50                           | 0.032                                    | 32                                 |
| CCPMAP<br>160003 | gastric<br>antrum | 2016          | CCPM              | 25                           | 0.016                                    | 128                                |
| CCPMAP<br>160004 | gastric<br>antrum | 2016          | CCPM              | 25                           | 0.064                                    | 64                                 |
| CCPMAP<br>160005 | gastric<br>antrum | 2016          | CCPM              | 50                           | 0.016                                    | 128                                |
| CCPMAP<br>160006 | gastric<br>antrum | 2016          | CCPM              | 25                           | 0.064                                    | 64                                 |
| CCPMAP<br>160007 | gastric<br>antrum | 2016          | CCPM              | 100                          | 0.032                                    | 32                                 |
| CCPMAP<br>160008 | gastric<br>antrum | 2016          | CCPM              | 50                           | 0.016                                    | 32                                 |
| CCPMAP<br>160009 | gastric<br>antrum | 2016          | CCPM              | 50                           | 0.016                                    | 64                                 |
| CCPMAP<br>160010 | gastric<br>antrum | 2016          | CCPM              | 100                          | 0.032                                    | 16                                 |
| CCPMAP<br>160011 | gastric<br>antrum | 2016          | CCPM              | 50                           | 2                                        | 32                                 |
| CCPMAP<br>160012 | gastric<br>antrum | 2016          | CCPM              | 50                           | 0.016                                    | 64                                 |
| CCPMAP<br>160013 | gastric<br>antrum | 2016          | CCPM              | 50                           | 0.032                                    | 16                                 |
| CCPMAP<br>160014 | gastric<br>antrum | 2016          | CCPM              | 50                           | 4                                        | 4                                  |
| CCPMAP<br>160015 | gastric<br>antrum | 2016          | CCPM              | 100                          | 0.064                                    | 128                                |

|                  |                   |      |                   |     |       |     |
|------------------|-------------------|------|-------------------|-----|-------|-----|
| CCPMAP<br>160016 | gastric<br>antrum | 2016 | CCPM              | 100 | 4     | 2   |
| CCPMAP<br>160017 | gastric<br>antrum | 2016 | CCPM              | 100 | 4     | 64  |
| ATCC43504        | gastric<br>antrum | 2011 | ATCC <sup>a</sup> | 25  | 0.016 | 128 |

<sup>a</sup>: CCPM, CAMS Collection Center of Pathogen Microorganisms; NA, not applicable; ATCC, the American Type Culture Collection.

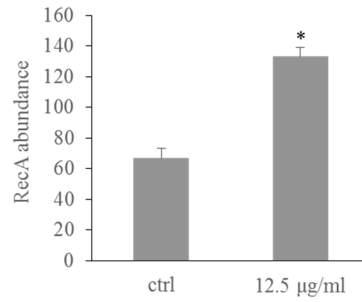

**Figure S1.** The expression of RecA in *H. pylori* with/without daphnetin exposure. Data was presented as mean and standard deviations (SD). \*  $P < 0.001$  vs. control.

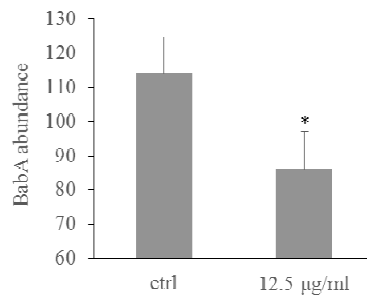

**Figure S2.** The expression of BabA in *H. pylori* with/without daphnetin exposure. Data was presented as mean and standard deviations (SD). \*  $P < 0.05$  vs. control.
